# Supplementary material
Source: PubMed Central journal article supplement (PMC6684407)
Supplement: NIHMS1531387-supplement-2.pdf [file NIHMS1531387-supplement-2.pdf]

**Supplementary Table 1. SAXS data collection and analysis of TcdB holotoxin**

|                                                                                 | pH = 7.4                         | pH = 5.0                                                     |
|---------------------------------------------------------------------------------|----------------------------------|--------------------------------------------------------------|
| <b><i>Data collection parameters</i></b>                                        |                                  |                                                              |
| Instrument                                                                      | SSRL BL4-2                       | SSRL BL4-2                                                   |
| Type of Experiment                                                              | SEC-SAXS                         | SEC-SAXS                                                     |
| Defining slits size (H mm × V mm)                                               | 0.25× 0.20                       | 0.25× 0.20                                                   |
| Detector distance (m)                                                           | 2.5                              | 2.5                                                          |
| Detector                                                                        | Pilatus3 X 1M                    | Pilatus3 X 1M                                                |
| Beam energy (keV)                                                               | 12.4                             | 12.4                                                         |
| $q$ range ( $\text{\AA}^{-1}$ )                                                 | 0.0056–0.40                      | 0.0046–0.40                                                  |
| Exposure time/frame (s)                                                         | 1                                | 1                                                            |
| Frames per data set                                                             | 500                              | 500                                                          |
| Temperature (K)                                                                 | 298                              | 298                                                          |
| <b><i>SEC parameters</i></b>                                                    |                                  |                                                              |
| SEC column                                                                      | Superdex 200 Increase PC 3.2/300 | Superdex 200 Increase PC 3.2/300                             |
| Sample concentration (mg/ml)                                                    | 20                               | 20                                                           |
| Injection volume ( $\mu\text{L}$ )                                              | 15                               | 30                                                           |
| HPLC flow rate (mL/min)                                                         | 0.05                             | 0.05                                                         |
| Buffer                                                                          | PBS, pH 7.4, and 5 mM DTT        | 20 mM sodium acetate,<br>50 mM NaCl, pH 5.0, and 5 mM<br>DTT |
| <b><i>Software employed</i></b>                                                 |                                  |                                                              |
| Primary data reduction                                                          | SasTool                          | SasTool                                                      |
| Data processing                                                                 | PRIMUS                           | PRIMUS                                                       |
| <b><i>Structural parameters</i></b>                                             |                                  |                                                              |
| <i>Guinier analysis</i>                                                         |                                  |                                                              |
| $I(0)$                                                                          | $402.45 \pm 1.50$                | $58.06 \pm 1.07$                                             |
| $R_g$ ( $\text{\AA}$ )                                                          | $59.20 \pm 3.22$                 | $61.30 \pm 1.41$                                             |
| $q_{\min}$ ( $\text{\AA}^{-1}$ )                                                | 0.0135                           | 0.0131                                                       |
| $qR_{g\max}$                                                                    | 1.3                              | 1.29                                                         |
| Coefficient of correlation, $R^2$                                               | 0.9995                           | 0.9998                                                       |
| <i>P(r) analysis</i>                                                            |                                  |                                                              |
| $I(0)$                                                                          | 416.40                           | 59.36                                                        |
| $R_g$ ( $\text{\AA}$ )                                                          | 63.18                            | 64.73                                                        |
| $D_{\max}$ ( $\text{\AA}$ )                                                     | 205.0                            | 233.0                                                        |
| $q$ range ( $\text{\AA}^{-1}$ )                                                 | 0.0135-0.257                     | 0.0106-0.257                                                 |
| $\chi^2$ (total estimate from GNOM)                                             | 0.239 (0.718)                    | 0.224 (0.770)                                                |
| Porod volume estimate ( $\text{\AA}^3$ )<br>(ratio $V_p/\text{calculated } M$ ) | 474000 (1.75)                    | 529000 (1.96)                                                |

|                                                                  |                       |                       |
|------------------------------------------------------------------|-----------------------|-----------------------|
| $V$ , $M$ using the Fischer method<br>(ratio of $M$ to expected) | 307063, 253338 (0.94) | 322532, 266099 (0.99) |
| <b><i>Curve fitting using atomic model</i></b>                   |                       |                       |
| Software employed                                                | <i>CRYSOL</i>         | <i>CRYSOL</i>         |
| q range for all modeling<br>(No constant subtraction)            | 0.0171-0.200          | 0.0171-0.200          |
| $\chi^2$ , $P$ -value                                            | 12.642, 0.00          | 0.293, 0.00           |
| Predicted $R_g$ (Å)                                              | 63.68                 | 64.27                 |
| Vol (Å), Ra (Å), Dro (e/Å <sup>3</sup> )                         | 328548, 1.400, 0.000  | 305434, 1.400, 0.030  |
| (Constant subtraction allowed)                                   |                       |                       |
| $\chi^2$ , $P$ -value                                            | 11.461, 0.00          | 0.293, 0.00           |
| Predicted $R_g$ (Å)                                              | 63.76                 | 64.27                 |
| Vol (Å), Ra (Å), Dro (e/Å <sup>3</sup> )                         | 305434, 1.800, 0.000  | 308736, 1.400, 0.030  |

**Supplementary Table 2. Relative quantum yield and steady state anisotropy for dye-labeled VHHs.**

## Standard Error of Measurement

| Alexa-555 | Relative Quantum Yield |             | Anisotropy    |               |
|-----------|------------------------|-------------|---------------|---------------|
|           | pH 7                   | pH 5        | pH 7          | pH 5          |
| Free Dye  | 1.00 ± 0.02            | 0.93 ± 0.02 | 0.209 ± 0.002 | 0.211 ± 0.008 |
| VHH B39   | 1.79 ± 0.06            | 1.82 ± 0.05 | 0.244 ± 0.003 | 0.255 ± 0.003 |
| VHH-TcdB  | 1.78 ± 0.06            | 1.79 ± 0.06 | 0.236 ± 0.006 | 0.272 ± 0.002 |

| Alexa-647 | Relative Quantum Yield |             | Anisotropy    |               |
|-----------|------------------------|-------------|---------------|---------------|
|           | pH 7                   | pH 5        | pH 7          | pH 5          |
| Free Dye  | 1.00 ± 0.03            | 0.99 ± 0.02 | 0.155 ± 0.003 | 0.141 ± 0.010 |
| VHH F7    | 1.56 ± 0.01            | 1.55 ± 0.04 | 0.260 ± 0.008 | 0.245 ± 0.010 |
| VHH-TcdB  | 1.62 ± 0.03            | 1.56 ± 0.01 | 0.245 ± 0.010 | 0.305 ± 0.008 |

**Supplementary Table 3. Protein-protein interactions in the TcdB<sup>1072-1433</sup>-5D, GTD-E3, and GTD VPI10463-7F complexes.**

Interactions between TcdB<sup>1072-1433</sup> and 5D

| <b>5D residues</b>   | <b>TcdB<sup>1072-1433</sup> residues</b>           | <b>Type of interaction</b>                     |
|----------------------|----------------------------------------------------|------------------------------------------------|
| T28                  | N1110                                              | Hydrogen bond (sc-sc)                          |
| Y50                  | E1307                                              | Hydrogen bond (sc-sc)                          |
| S52                  | E1311                                              | Hydrogen bond (sc-sc)                          |
| A53                  | E1311                                              | Hydrogen bond (mc-sc)                          |
| S54                  | E1311                                              | Hydrogen bond (sc-sc)                          |
| A55                  | E1311                                              | Hydrogen bond (mc-sc)                          |
| R56                  | E1311                                              | Hydrogen bond (sc-mc)                          |
| T57                  | E1311                                              | Hydrogen bond (sc-sc)                          |
|                      | N1332                                              | Hydrogen bond (sc-sc)                          |
| Y31<br>Y32<br>F101   | P1105<br>L1107<br>L1112<br>T1306<br>Y1308          | vdW (sc-sc)                                    |
| S104<br>S105<br>V106 | T1305<br>Q1330<br>Y1331<br>V1356<br>T1357<br>I1358 | vdW (sc-sc)                                    |
| R108                 | R1310<br>N1332                                     | Hydrogen bond (sc-sc)<br>Hydrogen bond (sc-sc) |

Interactions between GTD and E3

| <b>E3 residues</b>              | <b>GTD residues</b>      | <b>Type of interaction</b>                                 |
|---------------------------------|--------------------------|------------------------------------------------------------|
| W47                             | D29                      | Hydrogen bond (mc-sc)                                      |
| N56                             | D51<br>S54               | Hydrogen bond (sc-water-sc)<br>Hydrogen bond (sc-water-sc) |
| S60                             | E33                      | Hydrogen bond (sc-sc)                                      |
| D61                             | K48                      | Salt bridge (sc-sc)                                        |
| K64                             | D51                      | Hydrogen bond (sc-water-sc)                                |
| K96                             | E23<br>Y63               | Hydrogen bond (sc-sc)<br>Hydrogen bond (sc-sc)             |
| R101                            | D22                      | Salt bridge (sc-sc)                                        |
| T35<br>L45<br>W47<br>S50<br>I58 | V25<br>A26<br>A30<br>L55 | vdW (sc-sc)                                                |

Interactions between GTD<sup>VP110463</sup> and 7F

| <b>7F residues</b> | <b>GTD residues</b> | <b>Type of interaction</b>  |
|--------------------|---------------------|-----------------------------|
| S27                | K216                | Hydrogen bond (sc-water-sc) |
| S30                | Y214                | Hydrogen bond (sc-mc)       |
| T31                | K216                | Hydrogen bond (sc-water-sc) |
|                    | N151                | Hydrogen bond (mc-sc)       |
| T33                | Y538                | Hydrogen bond (sc-sc)       |
| T37                | R158                | Hydrogen bond (sc-sc)       |
| W47                | R158                | Hydrogen bond (sc-sc)       |
| S50                | E155                | Hydrogen bond (sc-sc)       |
| S53                | S148                | Hydrogen bond (sc-sc)       |
|                    | D152                | Hydrogen bond (mc-sc)       |
| G54                | D152                | Hydrogen bond (mc-sc)       |
| K58                | R158                | Hydrogen bond (sc-water-mc) |
| N73                | E213                | Hydrogen bond (sc-water-sc) |
| N99                | E147                | Hydrogen bond (sc-sc)       |
|                    | N151                | Hydrogen bond (sc-sc)       |
| A100               | N537                | Hydrogen bond (mc-sc)       |
| S102               | E147                | Hydrogen bond (sc-water-sc) |
| S104               | N537                | Hydrogen bond (mc-water-mc) |
|                    | N537                | Hydrogen bond (sc-mc)       |
|                    | Y538                | Hydrogen bond (sc-mc)       |
| A100               | I150                | vdW (sc-sc)                 |
| V101               | L154                |                             |
|                    | Y534                |                             |
|                    | Y538                |                             |

“vdW” stands for van der Waals interaction. “mc” and “sc” indicates whether the contact was mediated by main-chain or side-chain atoms.
