# Supplementary material
Source: PubMed Central journal article supplement (PMC6684407)
Supplement: NIHMS1531387-supplement-3.pdf [file NIHMS1531387-supplement-3.pdf]

**Supplementary Note. Intra-domain and inter-domain linkages in TcdB identified by XL-MS.**

| Intra-Domain Linkages (60) |            |            |            |         |             |             |
|----------------------------|------------|------------|------------|---------|-------------|-------------|
| Subunit a                  | Subunit b  | Position a | Position b | Sum Ids | Bio Rep IDs | Distance(Å) |
| TcdB-CPD                   | TcdB-CPD   | K572       | K601       | 26      | 3*          | 8.1         |
| TcdB-CPD                   | TcdB-CPD   | K572       | K646       | 16      | 3           | 22.2        |
| TcdB-CPD                   | TcdB-CPD   | K572       | K648       | 18      | 3           | 20.7        |
| TcdB-CPD                   | TcdB-CPD   | K572       | K765       | 16      | 3*          | 20.4        |
| TcdB-CPD                   | TcdB-CPD   | K572       | K771       | 11      | 3           | 23.3        |
| TcdB-CPD                   | TcdB-CPD   | K601       | K646       | 14      | 3*          | 15.6        |
| TcdB-CPD                   | TcdB-CPD   | K601       | K648       | 14      | 3*          | 12.9        |
| TcdB-CPD                   | TcdB-CPD   | K601       | K771       | 23      | 3*          | 20.8        |
| TcdB-CPD                   | TcdB-CPD   | K601       | K776       | 17      | 3*          | 18.1        |
| TcdB-CPD                   | TcdB-CPD   | K646       | K771       | 7       | 3           | 26.4        |
| TcdB-CPD                   | TcdB-CPD   | K646       | K776       | 16      | 3*          | 18.7        |
| TcdB-CPD                   | TcdB-CPD   | K646       | K784       | 11      | 3           | 24.9        |
| TcdB-CPD                   | TcdB-CPD   | K646       | K787       | 22      | 3           | 24.9        |
| TcdB-CPD                   | TcdB-CPD   | K646       | K791       | 78      | 3*          | 15.8        |
| TcdB-CPD                   | TcdB-CPD   | K646       | K793       | 12      | 3*          | 16.7        |
| TcdB-CPD                   | TcdB-CPD   | K648       | K771       | 12      | 3*          | 22.3        |
| TcdB-CPD                   | TcdB-CPD   | K648       | K791       | 12      | 3*          | 15.1        |
| TcdB-CPD                   | TcdB-CPD   | K765       | K776       | 34      | 3*          | 17.4        |
| TcdB-CPD                   | TcdB-CPD   | K771       | K784       | 8       | 3           | 32.7        |
| TcdB-CPD                   | TcdB-CPD   | K771       | K787       | 7       | 3           | 26.2        |
| TcdB-CPD                   | TcdB-CPD   | K771       | K791       | 7       | 3           | 18.5        |
| TcdB-CPD                   | TcdB-CPD   | K771       | K793       | 8       | 3           | 13.6        |
| TcdB-CPD                   | TcdB-CPD   | K776       | K787       | 7       | 3           | 19.1        |
| TcdB-CPD                   | TcdB-CPD   | K776       | K791       | 8       | 3           | 10.7        |
| TcdB-CPD                   | TcdB-CPD   | K776       | K793       | 22      | 3*          | 7.6         |
| TcdB-CPD                   | TcdB-CPD   | K784       | K791       | 12      | 3           | 16.2        |
| TcdB-CROPS                 | TcdB-CROPS | K1977      | K1997      | 9       | 3*          | 14          |
| TcdB-CROPS                 | TcdB-CROPS | K2230      | K2234      | 5       | 3           | 12          |
| TcdB-CROPS                 | TcdB-CROPS | K2230      | K2249      | 11      | 3           | 14.3        |
| TcdB-CROPS                 | TcdB-CROPS | K2234      | K2249      | 20      | 3*          | 6.8         |
| TcdB-GTD                   | TcdB-GTD   | K11        | K73        | 19      | 3           | 15.1        |
| TcdB-GTD                   | TcdB-GTD   | K11        | K74        | 19      | 3           | 13.5        |
| TcdB-GTD                   | TcdB-GTD   | K142       | K536       | 25      | 3*          | 20.9        |
| TcdB-GTD                   | TcdB-GTD   | K143       | K216       | 288     | 3*          | 12.6        |
| TcdB-GTD                   | TcdB-GTD   | K143       | K517       | 21      | 3*          | 23.9        |
| TcdB-GTD                   | TcdB-GTD   | K143       | K536       | 53      | 3*          | 18          |
| TcdB-GTD                   | TcdB-GTD   | K143       | K537       | 13      | 3           | 19.1        |
| TcdB-GTD                   | TcdB-GTD   | K194       | K247       | 97      | 3*          | 17.3        |
| TcdB-GTD                   | TcdB-GTD   | K299       | K506       | 6       | 3*          | 16.8        |
| TcdB-GTD                   | TcdB-GTD   | K303       | K380       | 22      | 3*          | 21.4        |
| TcdB-GTD                   | TcdB-GTD   | K303       | K506       | 38      | 3*          | 20.5        |
| TcdB-GTD                   | TcdB-GTD   | K334       | K517       | 5       | 3*          | 13          |
| TcdB-GTD                   | TcdB-GTD   | K380       | K506       | 22      | 3*          | 11.3        |
| TcdB-GTD                   | TcdB-GTD   | K50        | K402       | 70      | 3*          | 17.2        |
| TcdB-GTD                   | TcdB-GTD   | K7         | K70        | 8       | 3           | 17.4        |
| TcdB-GTD                   | TcdB-GTD   | K7         | K73        | 8       | 3           | 17.5        |
| TcdB-GTD                   | TcdB-GTD   | K7         | K74        | 8       | 3           | 16.2        |
| TcdB-DRBD                  | TcdB-DRBD  | K1126      | K1250      | 31      | 3*          | 8.9         |
| TcdB-DRBD                  | TcdB-DRBD  | K1427      | K1459      | 18      | 3*          | 10.3        |
| TcdB-DRBD                  | TcdB-DRBD  | K1459      | K1522      | 12      | 3*          | 12.3        |
| TcdB-DRBD                  | TcdB-DRBD  | K1471      | K1518      | 28      | 3*          | 11.6        |
| TcdB-DRBD                  | TcdB-DRBD  | K1481      | K1504      | 12      | 3*          | 12.1        |
| TcdB-DRBD                  | TcdB-DRBD  | K1504      | K1549      | 121     | 3*          | 12.5        |
| TcdB-DRBD                  | TcdB-DRBD  | K1504      | K1552      | 9       | 3           | 17.3        |
| TcdB-DRBD                  | TcdB-DRBD  | K1522      | K1552      | 37      | 3           | 13.9        |
| TcdB-DRBD                  | TcdB-DRBD  | K1534      | K1568      | 49      | 3*          | 15.4        |
| TcdB-DRBD                  | TcdB-DRBD  | K1773      | K1780      | 18      | 3           | 13.3        |
| TcdB-DRBD                  | TcdB-DRBD  | K846       | K1765      | 21      | 3*          | 16          |
| TcdB-DRBD                  | TcdB-DRBD  | K846       | K1773      | 40      | 3*          | 15.5        |
| TcdB-DRBD                  | TcdB-DRBD  | K857       | K1773      | 26      | 3           | 15          |

| <b>Inter-Domain Linkages (27)</b> |            |       |       |     |    |                     |
|-----------------------------------|------------|-------|-------|-----|----|---------------------|
| TcdB-CPD                          | TcdB-DRBD  | K572  | K1760 | 104 | 3* | 28.3                |
| TcdB-CPD                          | TcdB-DRBD  | K646  | K1775 | 7   | 3  | 29.1                |
| TcdB-CPD                          | TcdB-DRBD  | K646  | K846  | 52  | 3* | 11                  |
| TcdB-CPD                          | TcdB-DRBD  | K784  | K1773 | 8   | 3  | 21.2                |
| TcdB-CPD                          | TcdB-DRBD  | K784  | K846  | 103 | 3  | 24.4                |
| TcdB-CPD                          | TcdB-DRBD  | K787  | K846  | 25  | 3* | 24.7                |
| TcdB-CPD                          | TcdB-DRBD  | K791  | K1773 | 9   | 3  | 14.3                |
| TcdB-CPD                          | TcdB-DRBD  | K791  | K846  | 41  | 3* | 13.7                |
| TcdB-GTD                          | TcdB-CPD   | K303  | K784  | 13  | 3  | 14.5                |
| TcdB-GTD                          | TcdB-CPD   | K303  | K787  | 11  | 3  | 16.4                |
| TcdB-GTD                          | TcdB-CPD   | K380  | K784  | 18  | 3* | 13.8                |
| TcdB-GTD                          | TcdB-CPD   | K380  | K787  | 17  | 3* | 7.2                 |
| TcdB-GTD                          | TcdB-CPD   | K506  | K784  | 76  | 3* | 17.3                |
| TcdB-GTD                          | TcdB-CPD   | K506  | K787  | 108 | 3* | 14.7                |
| TcdB-GTD                          | TcdB-CPD   | K529  | K572  | 4   | 3  | 31.8                |
| TcdB-GTD                          | TcdB-DRBD  | K536  | K765  | 7   | 3* | 20.1                |
| TcdB-GTD                          | TcdB-DRBD  | K11   | K904  | 288 | 3* | 15.1                |
| TcdB-GTD                          | TcdB-DRBD  | K7    | K904  | 48  | 3  | 20                  |
| TcdB-GTD                          | TcdB-DRBD  | K70   | K857  | 12  | 3  | 22.4                |
| TcdB-GTD                          | TcdB-DRBD  | NT    | K916  | 24  | 3* | 17.7                |
| <b>Novel Set</b>                  |            |       |       |     |    |                     |
|                                   |            |       |       |     |    | <b>Distance (Å)</b> |
| TcdB-DRBD                         | TcdB-CROPS | K1117 | K2249 | 25  | 3  | 209.2               |
| TcdB-DRBD                         | TcdB-CROPS | K1120 | K2234 | 14  | 3  | 203.8               |
| TcdB-DRBD                         | TcdB-CROPS | K1120 | K2249 | 203 | 3* | 207.2               |
| TcdB-DRBD                         | TcdB-CROPS | K1126 | K2249 | 72  | 3* | 204.2               |
| TcdB-DRBD                         | TcdB-CROPS | K1504 | K1977 | 15  | 3* | 117.1               |
| TcdB-DRBD                         | TcdB-CROPS | K1549 | K1965 | 141 | 3* | 96.4                |
| TcdB-DRBD                         | TcdB-CROPS | K1549 | K1977 | 41  | 3* | 108                 |

\* The stars indicate the cross-linked peptides that were confirmed by in-gel digestion LC-MS<sup>n</sup> analysis.
